# Supplementary material for: Hsp70 and NF-kB Mediated Control of Innate Inflammatory Responses in a Canine Macrophage Cell Line
Source: MDPI journal article supplement (doi:10.3390/ijms21186464), 2020-09-04
Supplement: s1 [file s1]

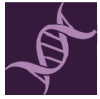

1 **Supplementary materials**

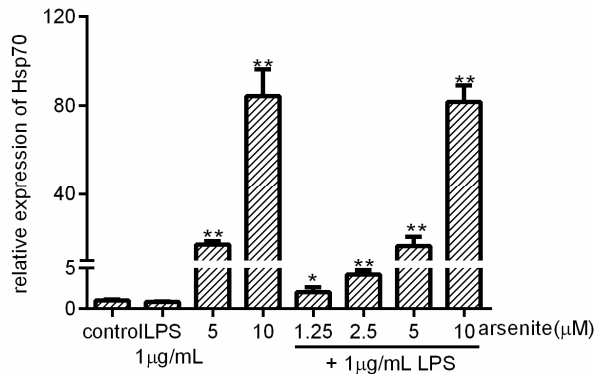

2 **Figure S1.** The expression of Hsp70 by 030D cells after arsenite and LPS stimulation. 030D cells were  
 3 treated with various concentration of arsenite (1.25 µM to 10 µM) for 16 h as indicated. Then they  
 4 were left unstimulated or stimulated with 1 µg/mL LPS for 6 h. mRNA expression of Hsp70 was  
 5 measured by qPCR. Data are shown as the mean ± SD and are representative of three independent  
 6 experiments. \* $p < 0.05$ , \*\* $p < 0.01$ , vs LPS alone group.

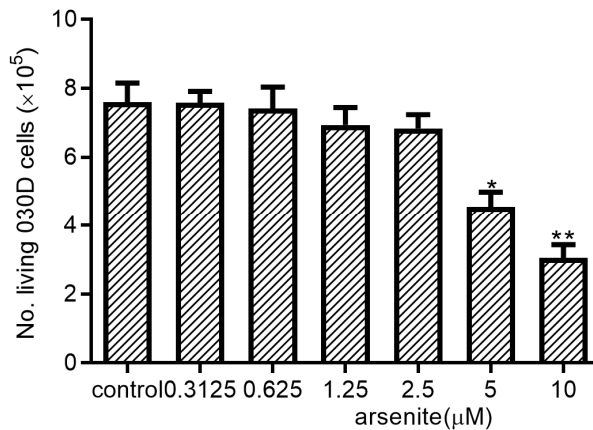

7  
 8 **Figure S2.** Effects of arsenite on the metabolic activity of 030D cells. 030D cells (2× 10<sup>5</sup> cells/well)  
 9 were incubated with the indicated concentrations of arsenite for 24 h. Living 030D cells were  
 10 counted. Untreated cells were used as control. Data are shown as the mean ± SD and representative  
 11 of three independent experiments. \* $p < 0.05$ , \*\* $p < 0.01$ , vs control group.

**Hsp70 (ENSCAFG00000000640) (3333 bp)**

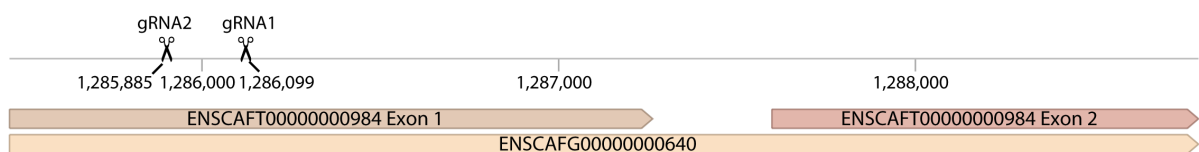

12 **Figure S3.** Targeting sites of gRNA

13

14

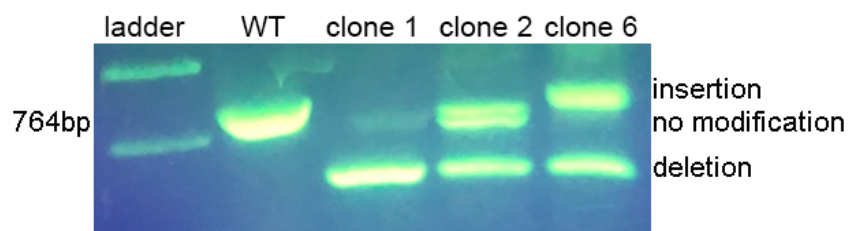

15

16

17

18

19

**Figure S4.** Validation of Hsp70 gene modification in 030D cell clones. Genomic DNA from these cells was isolated. PCR was performed using Hsp70 primers that cover the restriction sites and PCR products were visualized by gel electrophoresis on 1% agarose gel. Clone 1, clone 2 and clone 6 are gene-modified. WT = wild type.

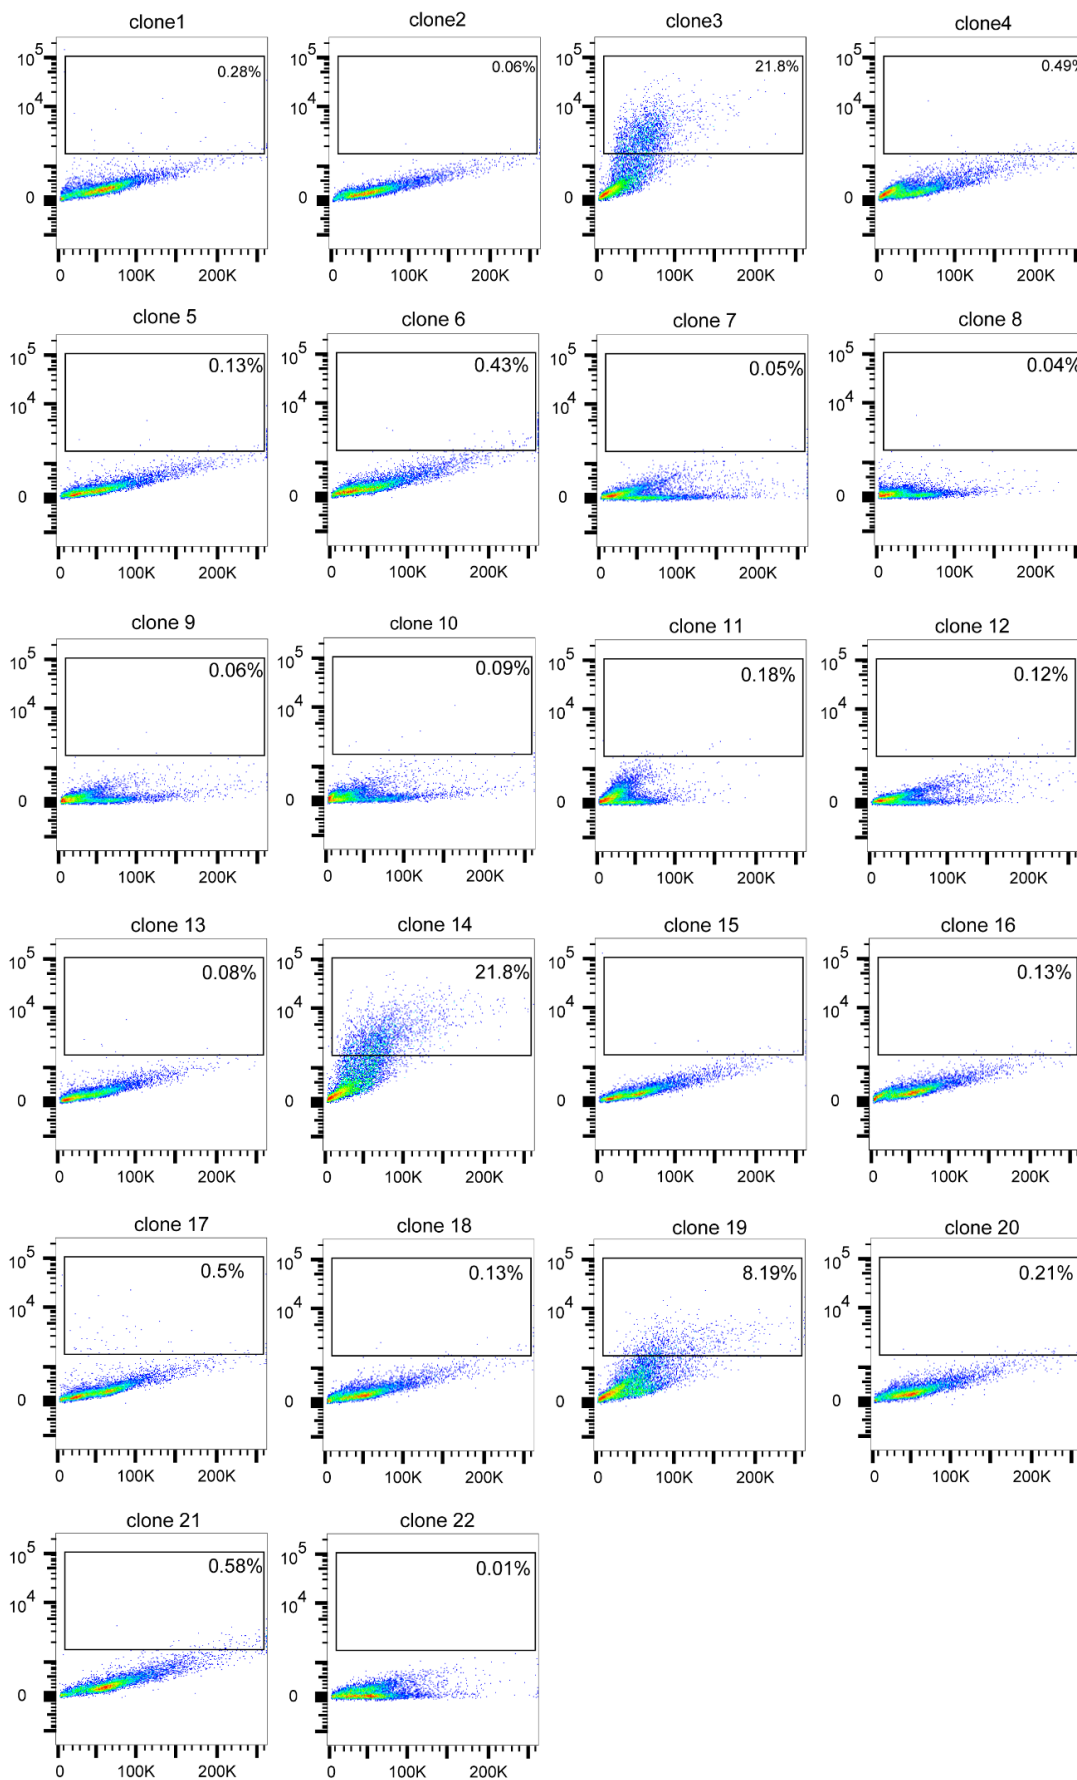

21 **Figure S5.** Flow cytometry analysis of gene-modified cell clones (1-22) to evaluate the expression of  
 22 Hsp70 in 030D cells.

23

24

25

26

27

28

29

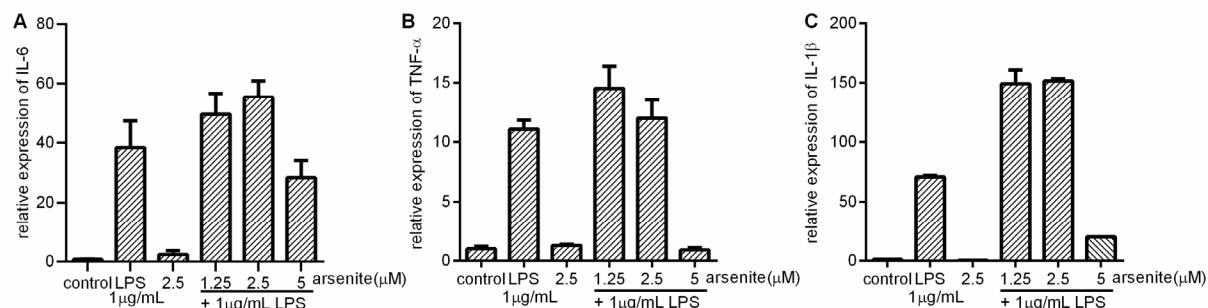

30

31

32

33

34

35

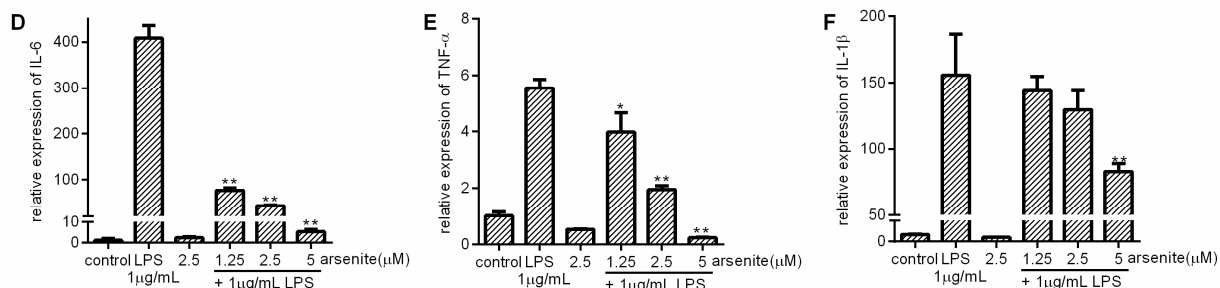

36 **Figure S6.** The effect of inducible Hsp70 on pro-inflammatory cytokine expression. A second Hsp70  
 37 knockout 030D clone, clone5 (A, B, C) and corresponding CRISPER/Cas9-treated wild type-like  
 38 clones, clone 3 (D, E, F) were treated with different concentrations (1.25, 2.5 or 5 μM) of arsenite or  
 39 without for 16 h and then exposed to LPS. The cells were harvested after 6 h of LPS exposure. qPCR  
 40 were performed to detect the expression of IL-6 (A), IL-1β (B) and TNF-α (C) on clone 5 and clone 3  
 41 (D, E, and F, respectively). Data are shown as the mean ± SD and are representative of three  
 42 independent experiments. \* $P < 0.05$ , \*\* $P < 0.01$ , and \*\*\* $P < 0.001$ , vs LPS alone group

43

>tr|F1PCU1|F1PCU1\_CANLF RELA proto-oncogene, NF-κB subunit OS=Canis lupus familiaris

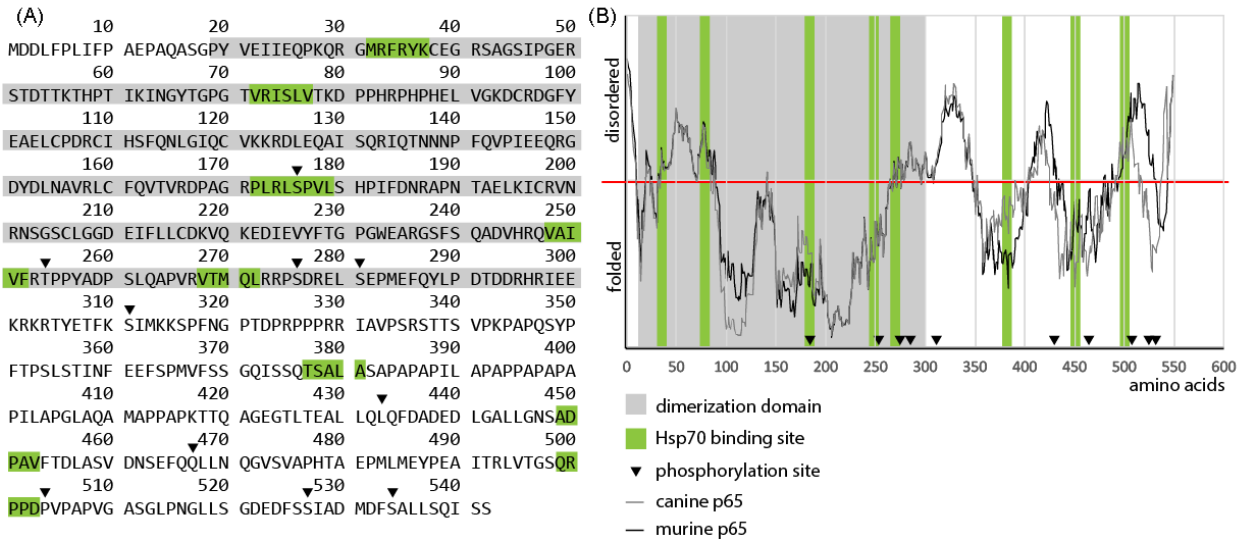

44 **Figure S7.** The prediction of the Hsp70 binding sites on p65 (RELA) protein. (A) shows the amino  
 45 acid sequence of canine p65. (B) shows that the amino acid sequence of murine p65 (UniProt ID:  
 46 Q04207) is strongly similar to canine p65 (UniProt ID: F1PCU1). Black triangle representative  
 47 reported phosphorylation sites; green: predicted Hsp70 binding sites on p65.
